# Supplementary material for: Defining micro-epidemiology for malaria elimination: systematic review and meta-analysis
Source: PubMed Central journal article supplement (PMC5399382; doi:10.1186/s12936-017-1792-1), 2017-04-20
Supplement: 12936_2017_1792_MOESM2_ESM.pdf [file 12936_2017_1792_MOESM2_ESM.pdf]

The Newcastle-Ottawa Scale for assessing the quality of nonrandomised studies in meta-analyses

Case control studies

|                            |      | Selection                                                 |                                        |                       | Comparability                                                                        |                                                                                                | Exposure                                     |                                           | Star total                    |   |
|----------------------------|------|-----------------------------------------------------------|----------------------------------------|-----------------------|--------------------------------------------------------------------------------------|------------------------------------------------------------------------------------------------|----------------------------------------------|-------------------------------------------|-------------------------------|---|
| Author                     | Year | Case definition adequate                                  | Representativeness of cases            | Selection of controls | Definition of controls                                                               | Controls for risk factors from one (★) or two (★★) groups in classification scheme             | Ascertainment                                | Same ascertainment for cases and controls | Non-response non differential |   |
| Alemu, Worku et al         | 2014 | Yes, with independent validation (by microscopy or RDT) ★ | Consecutive series ★                   | Community controls ★  | No malaria infection (by microscopy or RDT) ★                                        | Adjusted for age, sex, travel ★                                                                | Interview not blinded to case/control status | Yes ★                                     | Not described                 | 6 |
| Brooker, Clarke et al      | 2004 | Yes, with independent validation (by microscopy) ★        | Consecutive series (school children) ★ | Community controls ★  | No malaria symptoms or negative by microscopy ★                                      | Matched on age and school, adjusted for underweight, medicine at home, altitude ★★             | Interview not blinded to case/control status | Yes ★                                     | Not described                 | 7 |
| Rosas-Aguirre, Ponce et al | 2015 | Yes, through record linkage ★                             | Representative sampling ★              | Community controls ★  | No passively detected malaria case in household (does not exclude malaria infection) | Adjusted for distance to drain, household size, potable water availability, animal ownership ★ | Interview not blinded to case/control status | Yes ★                                     | Not described                 | 5 |

Cross sectional studies

| Author                   | Year | Case definition adequate                           | Selection                        |                       | Definition of controls                 | Comparability                                                                                                            | Ascertainment                                    | Exposure                                  |                                                         | Star total |
|--------------------------|------|----------------------------------------------------|----------------------------------|-----------------------|----------------------------------------|--------------------------------------------------------------------------------------------------------------------------|--------------------------------------------------|-------------------------------------------|---------------------------------------------------------|------------|
|                          |      |                                                    | Representativeness of cases      | Selection of controls |                                        | Controls for risk factors from one (★) or two (★★) groups in classification scheme                                       |                                                  | Same ascertainment for cases and controls | Non-response non differential                           |            |
| Atieli, Zhou et al       | 2011 | Yes, with independent validation (by microscopy) ★ | Representative random sampling ★ | Community controls ★  | No malaria infection (by microscopy) ★ | No adjustment for confounders                                                                                            | Structured interview blind to infection status ★ | Yes ★                                     | Not described                                           | 6          |
| Audibert, Josseran et al | 1990 | Yes, with independent validation (by microscopy) ★ | Representative random sampling ★ | Community controls ★  | No malaria infection (by microscopy) ★ | No adjustment                                                                                                            | Structured interview blind to infection status ★ | Yes ★                                     | Not described                                           | 6          |
| Baragatti, Fournet et al | 2009 | Yes, with independent validation (by microscopy) ★ | Representative random sampling ★ | Community controls ★  | No malaria infection (by microscopy) ★ | Controls for age, bed net use, equipment and education levels, season, land tenure, distance to drinking fountain ★★     | Structured interview blind to infection status ★ | Yes ★                                     | Not described                                           | 8          |
| Cattani, Moir et al      | 1986 | Yes, with independent validation (by microscopy) ★ | Census sampling ★                | Community controls ★  | No malaria infection (by microscopy) ★ | No adjustment                                                                                                            | Structured interview blind to infection status ★ | Yes ★                                     | Participation rate exceeded 78% overall ★               | 7          |
| Florey, King et al       | 2012 | Yes, with independent validation (by PCR) ★        | Census sampling ★                | Community controls ★  | No malaria infection (by PCR) ★        | Controls for age, recent malaria treatment, malaria knowledge, household socioeconomic status, outdoor night activity ★★ | Structured interview blind to infection status ★ | Yes ★                                     | Participation rate 41.3%, adult males under-represented | 8          |
| Haque, Magalhaes et al   | 2011 | Yes, with independent validation (by RDT) ★        | Representative random sampling ★ | Community controls ★  | No malaria infection (by RDT) ★        | Controls for age, ethnicity, altitude, forest density, household density ★★                                              | Structured interview blind to infection status ★ | Yes ★                                     | Not described                                           | 8          |

Cross sectional studies continued

|                           |      |                                                            |                                  |                      |                                        |                                                                                                                                                                             |                                                      |       |               |   |
|---------------------------|------|------------------------------------------------------------|----------------------------------|----------------------|----------------------------------------|-----------------------------------------------------------------------------------------------------------------------------------------------------------------------------|------------------------------------------------------|-------|---------------|---|
| Haque, Sunahara et al     | 2011 | Yes, with independent validation (by RDT) ★                | Representative random sampling ★ | Community controls ★ | No malaria infection (by RDT) ★        | Controls for ethnicity, occupation, bed net ownership, forest density, altitude, floor materials, household density, access to malaria control program ★★                   | Structured interview blind to infection status ★     | Yes ★ | Not described | 8 |
| Mosha, Sturrock et al     | 2014 | Yes, with independent validation (by PCR) ★                | Representative random sampling ★ | Community controls ★ | No malaria infection (by PCR) ★        | Controls for age, sex, bed net use, household quality, education, proximity to a breeding site, distance to a health facility, residence in a hotspot ★★                    | Structured interview blind to infection status ★     | Yes ★ | Not described | 8 |
| Mosha, Sturrock et al     | 2013 | Yes, with independent validation (by PCR) ★                | Census sampling ★                | Community controls ★ | No malaria infection (by PCR) ★        | Controls for age and household exposure ★                                                                                                                                   | Structured interview blind to infection status ★     | Yes ★ | Not described | 7 |
| Murhandarwati, Fuad et al | 2014 | Yes, with independent validation (by microscopy) ★         | All cases selected ★             | No controls          | No controls                            | No adjustment, descriptive and qualitative only                                                                                                                             | Structured interview not blinded to infection status | N/A   | Not described | 2 |
| Ndiath, Faye et al        | 2014 | Yes, with independent validation (by microscopy and RDT) ★ | Representative random sampling ★ | Community controls ★ | No malaria infection (by microscopy) ★ | Controls for age, materials of sleeping rooms, materials of floor, window in room, distance to livestock, bed net use, goat ownership, socioeconomic status of household ★★ | Structured interview blind to infection status ★     | Yes ★ | Not described | 8 |
| Nixon, Nixon et al        | 2014 | Yes, with independent validation (by microscopy) ★         | Representative random sampling ★ | Community controls ★ | No malaria infection (by microscopy) ★ | Controls for age, distance to breeding sites, distance to health facility, number of household residents ★★                                                                 | Structured interview blind to infection status ★     | Yes ★ | Not described | 8 |

Cross sectional studies continued

|                                 |      |                                                            |                                                                                                                     |                        |                                        |                                                                                                                                                                                                           |                                                  |       |                                                                                                             |   |
|---------------------------------|------|------------------------------------------------------------|---------------------------------------------------------------------------------------------------------------------|------------------------|----------------------------------------|-----------------------------------------------------------------------------------------------------------------------------------------------------------------------------------------------------------|--------------------------------------------------|-------|-------------------------------------------------------------------------------------------------------------|---|
| Prakash, Mohapatra              | 2000 | Yes, with independent validation (by microscopy) ★         | Census sampling ★                                                                                                   | Community controls ★   | No malaria infection (by microscopy) ★ | No adjustment for confounders                                                                                                                                                                             | Structured interview blind to infection status ★ | Yes ★ | Not described                                                                                               | 6 |
| Pullan, Bukirwa et al           | 2010 | Yes, with independent validation (by microscopy and RDT) ★ | Census sampling ★                                                                                                   | Community controls ★   | No malaria infection (by microscopy) ★ | Controls for age, distance to agriculture, distance to health centre ★★                                                                                                                                   | Structured interview blind to infection status ★ | Yes ★ | Not described                                                                                               | 8 |
| Pullan, Kabatereine et al       | 2011 | Yes, with independent validation (by microscopy and RDT) ★ | Census sampling ★                                                                                                   | Community controls ★   | No malaria infection (by microscopy) ★ | Controls for age, bed net use, distance to agriculture, distance to health centre, hookworm infection ★★                                                                                                  | Structured interview blind to infection status ★ | Yes ★ | Not described                                                                                               | 8 |
| Rosas-Aguirre, Speybroeck et al | 2015 | Yes, with independent validation (by PCR) ★                | Representative random sampling ★                                                                                    | Community controls ★   | No malaria infection (by PCR) ★        | Controls for age, location, outdoor occupation ★★                                                                                                                                                         | Structured interview blind to infection status ★ | Yes ★ | Not described                                                                                               | 8 |
| Rulisa, Kateera et al           | 2013 | Yes, with independent validation (by microscopy and RDT) ★ | Potential for selection bias (health centre recruitment)                                                            | Health centre controls | No malaria infection (by microscopy) ★ | Controls for age, sex, household member with malaria, bed net ownership, house wall material, house roof material, open water vessel in household, environment around household, household electricity ★★ | Structured interview blind to infection status ★ | Yes ★ | Not described                                                                                               | 6 |
| Sissoko, van den Hougen et al   | 2015 | Yes, with independent validation (by microscopy) ★         | Potential for selection bias (random sampling repeated until minimum number of consenting individuals participated) | Community controls ★   | No malaria infection (by microscopy) ★ | Controls for bed net use, open eaves, window surface and other confounders not further described ★★                                                                                                       | Structured interview blind to infection status ★ | Yes ★ | Participation rate exceeded 90% of consenting individuals, proportion of non-consenting individuals unknown | 7 |

**Cross sectional studies continued**

|                             |      |                                                    |                                  |                      |                                        |                                       |                                                  |       |               |   |
|-----------------------------|------|----------------------------------------------------|----------------------------------|----------------------|----------------------------------------|---------------------------------------|--------------------------------------------------|-------|---------------|---|
| Trape, Lefebvre-Zante et al | 1992 | Yes, with independent validation (by microscopy) ★ | Representative random sampling ★ | Community controls ★ | No malaria infection (by microscopy) ★ | No adjustment                         | Structured interview blind to infection status ★ | Yes ★ | Not described | 6 |
| Winskill, Rowland et al     | 2011 | Yes, with independent validation (by microscopy) ★ | Census sampling ★                | Community controls ★ | No malaria infection (by microscopy) ★ | Controls for age, sex, bed net use ★★ | Structured interview blind to infection status ★ | Yes ★ | Not described | 8 |

Cohort studies

|                         |      | Selection                                                                                             |                                               |                        | Comparability                |                                                                                                                                                              |                                                        | Outcome              |                                      | Star total |
|-------------------------|------|-------------------------------------------------------------------------------------------------------|-----------------------------------------------|------------------------|------------------------------|--------------------------------------------------------------------------------------------------------------------------------------------------------------|--------------------------------------------------------|----------------------|--------------------------------------|------------|
| Author                  | Year | Representativeness of exposed                                                                         | Representativeness of non-exposed             | Exposure ascertainment | Outcome not present at start | Controls for risk factors from one (★) or two (★★) groups in classification scheme                                                                           | Ascertainment                                          | Follow up sufficient | Completion rate                      |            |
| Barrera, Grillet et al  | 1999 | Somewhat representative of the inhabitants of the study area ★                                        | Drawn from same community as exposed cohort ★ | Structured interview ★ | No                           | Adjusts for number of inhabitants, density of breeding sites, distance to breeding sites ★★                                                                  | Record linkage ★                                       | Yes (12 years) ★     | Not described                        | 7          |
| Barros and Honario      | 2015 | Truly representative sampling of children in the study area ★                                         | Drawn from same community as exposed cohort ★ | Structured interview ★ | No                           | No adjustment                                                                                                                                                | Independent blind assessment (by microscopy) ★         | Yes (2.5 years) ★    | Not described                        | 5          |
| Basurko, Demattei et al | 2013 | Selected group (permanent residents only, despite high proportion of local population being migrants) | Drawn from same community as exposed cohort ★ | Structured interview ★ | No                           | No adjustment                                                                                                                                                | Independent blind assessment (by microscopy) ★         | Yes (6 years) ★      | Not sufficiently described to assess | 4          |
| Bejon, Williams et al   | 2010 | Truly representative sampling of children in the study area ★                                         | Drawn from same community as exposed cohort ★ | Structured interview ★ | No                           | Adjusts for vegetation index, day time temperature, night time temperature, middle infra-red bi-annual phase, parasite genotyping (MSP2), antibody titres ★★ | Independent blind assessment (by microscopy and PCR) ★ | Yes (12 years) ★     | Not described                        | 7          |
| Bousema, Drakeley et al | 2010 | Selected group (clinical trial participants)                                                          | Drawn from same community as exposed cohort ★ | Structured interview ★ | No                           | Adjusts for distance to breeding site, wealth index, roof material, wall material, wall structure, bed net use ★★                                            | Independent blind assessment (by RDT) ★                | Yes (4 years) ★      | Not described                        | 6          |

Cohort studies continued

|                               |      |                                                                         |                                               |                        |       |                                                                                                                                                                                                     |                                                        |                   |                                                                                                                               |   |
|-------------------------------|------|-------------------------------------------------------------------------|-----------------------------------------------|------------------------|-------|-----------------------------------------------------------------------------------------------------------------------------------------------------------------------------------------------------|--------------------------------------------------------|-------------------|-------------------------------------------------------------------------------------------------------------------------------|---|
| Camargo, Ferreira et al       | 1994 | Truly representative sampling of the inhabitants in the study area ★    | Drawn from same community as exposed cohort ★ | Structured interview ★ | No    | No adjustment                                                                                                                                                                                       | Independent blind assessment (by microscopy) ★         | Yes (1 year) ★    | Follow up rate <80% due to high population mobility, but open cohort well documented and accounted for at each survey point ★ | 6 |
| Clark, Greenhouse et al       | 2008 | Truly representative sampling of children in the study area ★           | Drawn from same community as exposed cohort ★ | Structured interview ★ | Yes ★ | Adjusts for age, sex, sickle cell trait, G6PD status, bed net use, wealth index, household crowding, distance from swamp ★★                                                                         | Independent blind assessment (by microscopy and PCR) ★ | Yes (2 years) ★   | Loss to follow-up unlikely to cause bias (>80% follow up) ★                                                                   | 9 |
| Coulibaly, Rebaudet et al     | 2013 | Truly representative sampling of children in the study area ★           | Drawn from same community as exposed cohort ★ | Structured interview ★ | No    | No adjustment                                                                                                                                                                                       | Independent blind assessment (by microscopy and PCR) ★ | Yes (5 years) ★   | Not described                                                                                                                 | 5 |
| da Silva-Nunes, Codeco et al  | 2008 | Truly representative sampling of the inhabitants in the study village ★ | Drawn from same community as exposed cohort ★ | Structured interview ★ | No    | Adjusts for gender, main occupation, years of residence in the area, recreational fishing, house location, number of inhabitants in the house, wealth index, sharing house with a land clearer □ ★★ | Independent blind assessment (by microscopy and PCR) ★ | Yes (14 months) ★ | Not described                                                                                                                 | 7 |
| de Barros, Honario and Arruda | 2011 | Somewhat representative of the inhabitants of the study area ★          | Drawn from same community as exposed cohort ★ | Structured interview ★ | No    | Adjusts for distance to breeding sites, distance to water collections, number of nights slept out of the house ★★                                                                                   | Record linkage ★                                       | Yes (2.5 years) ★ | Not described                                                                                                                 | 7 |
| Ernst, Adoka et al            | 2006 | Truly representative sampling of the inhabitants in the study village ★ | Drawn from same community as exposed cohort ★ | Structured interview ★ | No    | Adjusts for metal roof, number in household, distance to swamp, distance to forest edge, elevation ★★                                                                                               | Record linkage ★                                       | Yes (4 years) ★   | Not described                                                                                                                 | 7 |

Cohort studies continued

|                             |      |                                                                         |                                               |                        |       |                                                                                                                                                                                                                                                               |                                                |                   |                                                             |   |
|-----------------------------|------|-------------------------------------------------------------------------|-----------------------------------------------|------------------------|-------|---------------------------------------------------------------------------------------------------------------------------------------------------------------------------------------------------------------------------------------------------------------|------------------------------------------------|-------------------|-------------------------------------------------------------|---|
| Gamage-Mendis, Carter et al | 1991 | Truly representative sampling of the inhabitants in the study village ★ | Drawn from same community as exposed cohort ★ | Structured interview ★ | No    | No adjustment                                                                                                                                                                                                                                                 | Independent blind assessment (by microscopy) ★ | Yes (17 months) ★ | Not described                                               | 5 |
| Gaudart, Poudiougou et al   | 2006 | Truly representative sampling of children in the study village ★        | Drawn from same community as exposed cohort ★ | Structured interview ★ | Yes ★ | Adjusts for age, access to treatment, thatched roofs, seasonality, presence of breeding sites ★★                                                                                                                                                              | Independent blind assessment (by microscopy) ★ | Yes (5 years) ★   | Loss to follow-up unlikely to cause bias (>80% follow up) ★ | 9 |
| Ghebreyesus, Haile et al    | 2000 | Truly representative sampling of children in the study village ★        | Drawn from same community as exposed cohort ★ | Structured interview ★ | No    | Adjusts for age, sex, roof material, type of eaves, windows, number of sleeping rooms, separate kitchen, animals sleep in house, number of animals owned, radio owned, source of water in dry season, source of water in wet season, use of irrigated land ★★ | Independent blind assessment (by microscopy) ★ | Yes (12 months) ★ | Loss to follow-up unlikely to cause bias (>90% follow up) ★ | 8 |
| Grange, Loucoubar et al     | 2015 | Truly representative sampling of the inhabitants of the study village ★ | Drawn from same community as exposed cohort ★ | Structured interview ★ | No    | Adjusts for age, type of anti-malarial drug used in study area at time, recent malaria episode, ABO blood group ★★                                                                                                                                            | Independent blind assessment (by microscopy) ★ | Yes (19 years) ★  | Not described                                               | 7 |
| Grillet, Barrera et al      | 2010 | Somewhat representative of the inhabitants of the study area ★          | Drawn from same community as exposed cohort ★ | Structured interview ★ | Yes ★ | Adjusts for terrain elevation, terrain slope, number of inhabitants per village, distance to the main road, breeding site density, distance to breeding site, distance to wetland ★★                                                                          | Record linkage ★                               | Yes (7 years) ★   | Not described                                               | 8 |
| Grillet, Jordan, Fortin     | 2010 | Somewhat representative of the inhabitants of the study area ★          | Drawn from same community as exposed cohort ★ | Structured interview ★ | No    | No adjustment                                                                                                                                                                                                                                                 | Record linkage ★                               | Yes (7 years) ★   | Not described                                               | 5 |



**Cohort studies continued**

|                                   |      |                                                                          |                                               |                        |       |                                                                                                                                                                                               |                                                |                   |                                                             |   |
|-----------------------------------|------|--------------------------------------------------------------------------|-----------------------------------------------|------------------------|-------|-----------------------------------------------------------------------------------------------------------------------------------------------------------------------------------------------|------------------------------------------------|-------------------|-------------------------------------------------------------|---|
| Gunawardena, Wickremasinghe et al | 1998 | Truly representative sampling of the inhabitants of the study villages ★ | Drawn from same community as exposed cohort ★ | Structured interview ★ | No    | No adjustment                                                                                                                                                                                 | Record linkage ★                               | Yes (18 months) ★ | Not described                                               | 5 |
| Haque, Glass et al                | 2013 | Somewhat representative of the inhabitants of the study area ★           | Drawn from same community as exposed cohort ★ | Structured interview ★ | No    | Adjusts for bed net ratio, wall material, housing density, proximity to streams, aspect, elevation, convergence index, wetness index ★★                                                       | Record linkage ★                               | Yes (2 years) ★   | Not described                                               | 7 |
| Kreuels, Kobbe et al              | 2008 | Selected population (children enrolled in randomised controlled trial)   | Drawn from same community as exposed cohort ★ | Structured interview ★ | No    | Controls for sex, ethnicity, birth season, sickle cell trait, mother's education, mother's occupation, knowledge of malaria, bed net use, screened windows, household socioeconomic status ★★ | Independent blind assessment (by microscopy) ★ | Yes (2 years) ★   | Not described                                               | 6 |
| Loha, Lunde et al                 | 2012 | Truly representative sampling of the inhabitants of the study village ★  | Drawn from same community as exposed cohort ★ | Structured interview ★ | No    | Controls for age, sex, wealth index, total nights spent under ITN, distance from breeding site, household density ★★                                                                          | Independent blind assessment (by microscopy) ★ | Yes (2 years) ★   | Not described                                               | 7 |
| Luxemburger, Thwai et al          | 1996 | Somewhat representative of the residents of the study area ★             | Drawn from same community as exposed cohort ★ | Structured interview ★ | Yes ★ | No adjustment                                                                                                                                                                                 | Independent blind assessment (by microscopy) ★ | Yes (12 months) ★ | Loss to follow-up unlikely to cause bias (>80% completion)  | 7 |
| Midega, Smith et al               | 2012 | Truly representative sampling of children in the study villages ★        | Drawn from same community as exposed cohort ★ | Structured interview ★ | No    | Controls for housing density, population density, gradient of slope, wind direction, number of larvae ★★                                                                                      | Independent blind assessment (by microscopy) ★ | Yes (12 months) ★ | Loss to follow-up unlikely to cause bias (>80% follow up) ★ | 8 |

Cohort studies continued

|                               |      |                                                                         |                                               |                        |       |                                                                                                                                                                                                                      |                                                |                   |                                                             |   |
|-------------------------------|------|-------------------------------------------------------------------------|-----------------------------------------------|------------------------|-------|----------------------------------------------------------------------------------------------------------------------------------------------------------------------------------------------------------------------|------------------------------------------------|-------------------|-------------------------------------------------------------|---|
| Olotu, Fegan et al            | 2012 | Truly representative sampling of children in the study villages ★       | Drawn from same community as exposed cohort ★ | Structured interview ★ | No    | Controls for residence in a hotspot, age ★                                                                                                                                                                           | Independent blind assessment (by microscopy) ★ | Yes (12 years) ★  | Not sufficiently described to assess                        | 6 |
| Parker, Matthews et al        | 2015 | Truly representative sampling of the inhabitants of the study village ★ | Drawn from same community as exposed cohort ★ | Structured interview ★ | No    | Controls for age, sex, citizenship, migrant status, elevation, dependency ratio ★★                                                                                                                                   | Independent blind assessment (by microscopy) ★ | Yes (10 months) ★ | Loss to follow-up unlikely to cause bias (>80% follow up) ★ | 8 |
| Peterson, Borrell et al       | 2009 | Somewhat representative of the residents of the study area ★            | Drawn from same community as exposed cohort ★ | Structured interview ★ | No    | Controls for age, sex, marital status, indoor work, regular/recent travel, distance to breeding sites, tidy compound, household preventive measures, number of livestock animals, number of children in household ★★ | Independent blind assessment (by microscopy) ★ | Yes (4 months) ★  | Not sufficiently described to assess                        | 7 |
| van der Hoek, Konradsen et al | 1998 | Truly representative sampling of individuals in the study village ★     | Drawn from same community as exposed cohort ★ | Structured interview ★ | Yes ★ | Controls for age, gender, household size, socioeconomic status, housing quality, distance to cattle shed, distance to stream, use of bed net, use of pyrethrum coils, use of traditional fumigants ★★                | Independent blind assessment (by microscopy) ★ | Yes (12 months) ★ | Not sufficiently described to assess                        | 8 |
| Ye, Kyobutungi et al          | 2007 | Truly representative sampling of children in the study villages ★       | Drawn from same community as exposed cohort ★ | Structured interview ★ | No    | Controls for age, gender, ethnicity, location, net use, proximity to well, proximity to farm, proximity to animal enclosure, proximity to breeding site, season ★★                                                   | Independent blind assessment (by microscopy) ★ | Yes (12 months) ★ | Loss to follow-up unlikely to cause bias (>80% follow up) ★ | 8 |
